# Supplementary material
Source: PubMed Central journal article supplement (PMC6047278)
Supplement: Supplementary_table.pdf [file Supplementary_table.pdf]

## SUPPLEMENTARY TABLE

**Table S1:** Registry-based diagnoses from the National Patient Registry used for the study

| Diagnosis*                             | ICD-8                  | ICD-10            |
|----------------------------------------|------------------------|-------------------|
| Asthma                                 | 493                    | J45, J46          |
| Cardiovascular disease, including:     |                        |                   |
| Ischemic heart disease                 | 410-414                | I20-25            |
| Stroke                                 | 431-434, 436           | I60-I69           |
| Celiac disease                         | 269.00                 | K90.0             |
| Chronic Obstructive Pulmonary Disease  | 491-492                | J42-J44           |
| Diabetes Mellitus Type 1               | 249                    | E10               |
| Gastrointestinal cancer                | 140-154                | C00-C18, C20-C21  |
| Inflammatory Bowel disease, including: |                        |                   |
| Ulcerative colitis                     | 563.01                 | K51               |
| Crohn's disease                        | 563.19                 | K50               |
| Liver disease                          | 570-573                | K70-K77           |
| Lymphoma                               | 200-202, 275.59        | C81-86, C88, C915 |
| Autoimmune diseases, including:        |                        |                   |
| Alopecia areata                        | 704.00                 | L63               |
| Ankylosing spondylitis                 | 712.49                 | M45               |
| Autoimmune hemolytic anemia            | 283.90-91              | D59.1             |
| Autoimmune hepatitis                   | 571.93                 | K75.4             |
| Autoimmune thyroiditis                 | 245.03                 | E06.3             |
| Celiac disease                         | 269.00                 | K90.0             |
| Crohn's disease                        | 563.19                 | K50               |
| Dermatopolymyositis                    | 716                    | M33               |
| Diabetes Mellitus Type 1               | 249                    | E10               |
| Guillain-Barre syndrome                | 354                    | G61.0             |
| Idiopathic thrombocytopenic purpura    | 446.49                 | D69.3             |
| Iridocyclitis                          | 364                    | H20               |
| Juvenile arthritis                     | 712.09                 | M08               |
| Multiple sclerosis                     | 340                    | G35               |
| Myasthenia gravis                      | 733.09                 | G70.0             |
| Pemphigoid                             | 694.05                 | L12               |
| Pemphigus                              | 694                    | L10               |
| Pernicious anemia                      | 281.0                  | D51.0             |
| Polymyalgia rheumatica                 | 446.30-31, 446.39      | M31.5-6, M35.3    |
| Primary adrenocortical insufficiency   | 255.1                  | E27.1             |
| Primary biliary cirrhosis              | 571.90                 | K74.3             |
| Psoriasis vulgaris                     | 696.09-10, 696.19      | L40               |
| Seropositive rheumatoid arthritis      | 712.19, 712.39, 712.59 | M05-M06           |
| Sjögren's syndrome                     | 734.90                 | M35.0             |
| Systemic lupus erythematosus           | 734.19                 | M32               |
| Systemic sclerosis                     | 734.0                  | M34               |
| Thyrotoxicosis                         | 242.00                 | E05.0             |
| Ulcerative colitis                     | 563.01                 | K51               |
| Vitiligo                               | 709.01                 | L80               |
| Wegener's granulomatosis               | 446.29                 | M31.3             |

\*The participants were considered to have a disease from these 10 groups if they had one of the diagnoses in the register, referral diagnoses were removed from our data.

ICD: International classification of disease
